# Supplementary material for: Involvement of exercise-induced macrophage migration inhibitory factor in the prevention of fatty liver disease
Source: PubMed Central journal article supplement (PMC3757527; doi:10.1530/joe-13-0135), 2013-08
Supplement: supp_JOE-13-0135_Supplementary_figure_1.pdf [file supp_JOE-13-0135_Supplementary_figure_1.pdf]

## Supplementary Fig 1.

**A.**

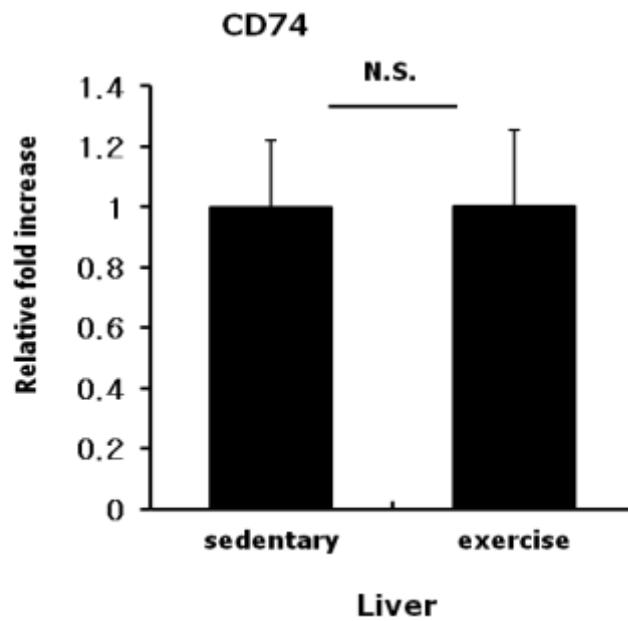

**Supplementary Fig. 1.** Expression of CD74 in sedentary and exercised mice. (A) RT-PCR analysis of CD74 mRNA in the liver of sedentary and exercised mice. 18s rRNA levels were used as a control. Data are presented as the mean  $\pm$  SE (Figures are representative of 10 sedentary and 9 exercised mouse samples).
