# Supplementary material for: Involvement of exercise-induced macrophage migration inhibitory factor in the prevention of fatty liver disease
Source: PubMed Central journal article supplement (PMC3757527; doi:10.1530/joe-13-0135), 2013-08
Supplement: supp_JOE-13-0135_Supplementary_figure_3.pdf [file supp_JOE-13-0135_Supplementary_figure_3.pdf]

### Supplementary Fig 3.

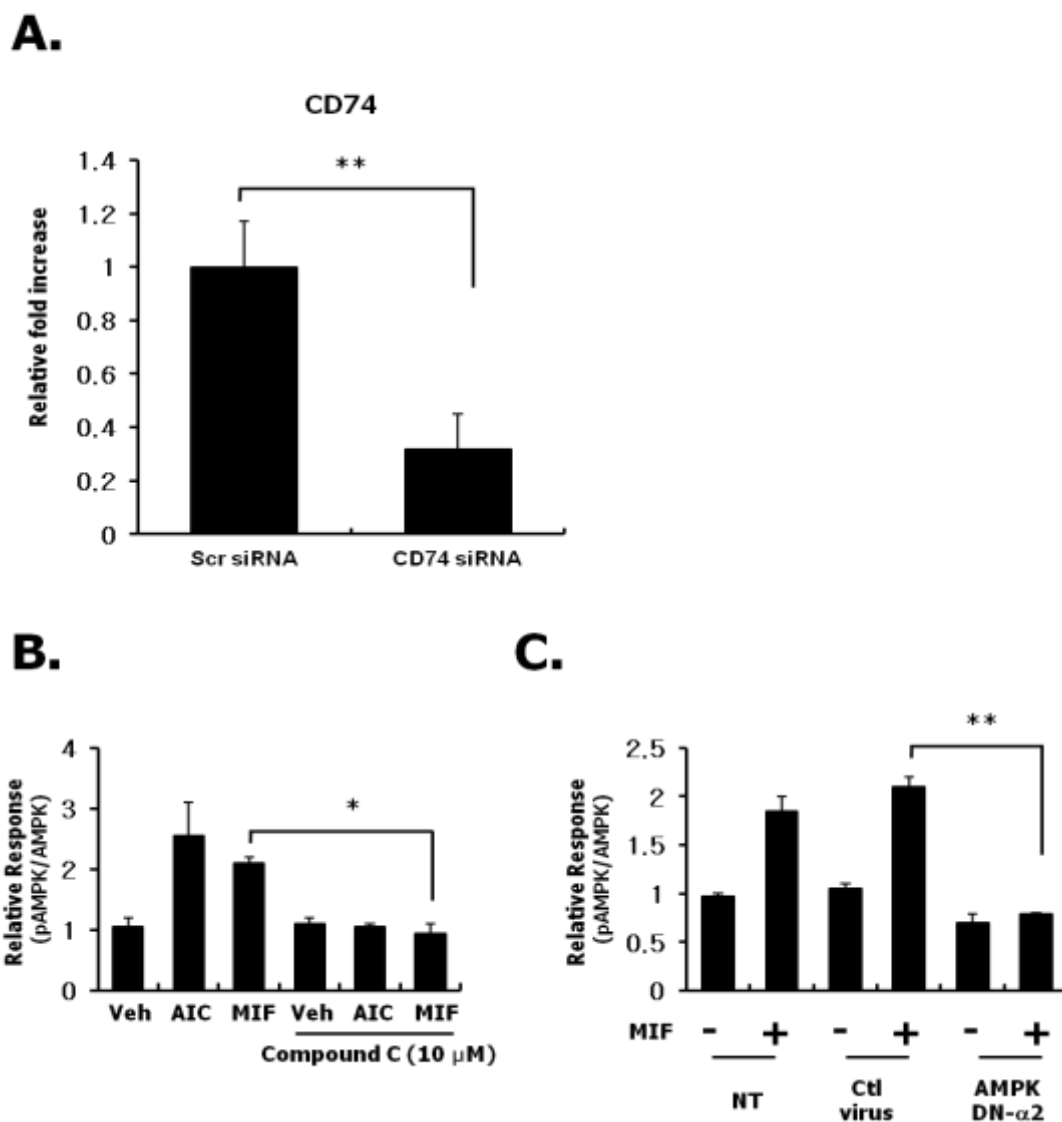

**Supplementary Fig. 3.** MIF stimulated palmitate oxidation in a CD74-AMPK-dependent manner. (A) RT-PCR analysis of *cd74* mRNA in the HepG2 cells transfected with scramble (Scr) siRNA or CD74 siRNA. 18s rRNA levels were used as a control. (B) HepG2 cells were pre-treated with compound C (10 μM) for 30 min and were then stimulated with MIF or AICAR for 1 h. Cell lysates were analyzed by Western blotting with an anti-phospho-AMPK(Thr72) antibody. (C) Cells infected with a mock adenovirus or an adenovirus carrying dominant-negative (DN)-AMPK  $\alpha 2$  at an MOI of 30 for 18 h were treated with or without MIF. Cell lysates were analyzed by Western blotting. (B, C) Bar graph depicts the mean (+ SE) ratio of intensity of phospho AMPK- to-total AMPK bands. \* $p < 0.05$ , \*\* $p < 0.01$  vs. control values (one-way ANOVA). Data are expressed as the means  $\pm$  SD of quadruplicated analyses.
