# Supplementary material for: Involvement of exercise-induced macrophage migration inhibitory factor in the prevention of fatty liver disease
Source: PubMed Central journal article supplement (PMC3757527; doi:10.1530/joe-13-0135), 2013-08
Supplement: supp_JOE-13-0135_Supplementary_figure_4.pdf [file supp_JOE-13-0135_Supplementary_figure_4.pdf]

## Supplementary Fig 4.

**A.**

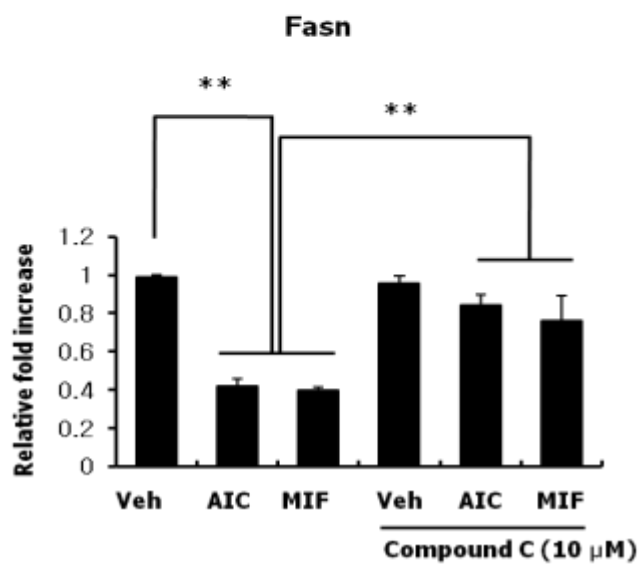

**Supplementary Fig. 4.** Effect of MIF on the expression of Fasn. (A) HepG2 cells were pre-treated with compound C (10 μM) for 30 min and were then stimulated with MIF or AICAR for 1 h. Cell lysates were analyzed by RT-PCR analysis with Fasn specific primer. 18s rRNA levels were used as a control. \*\* $p < 0.01$  vs. control values (one-way ANOVA). Data are expressed as the means  $\pm$  SD of triplicate analyses.
