# Supplementary material for: Involvement of exercise-induced macrophage migration inhibitory factor in the prevention of fatty liver disease
Source: PubMed Central journal article supplement (PMC3757527; doi:10.1530/joe-13-0135), 2013-08
Supplement: supp_JOE-13-0135_Supplementary_figure_5.pdf [file supp_JOE-13-0135_Supplementary_figure_5.pdf]

## Supplementary Fig 5.

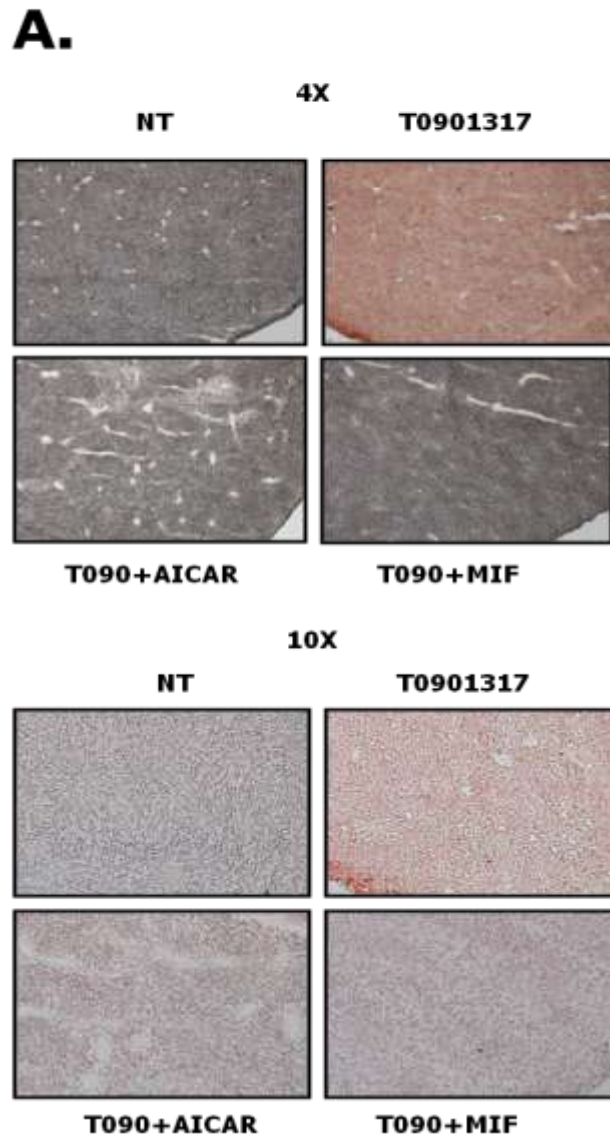

**Supplementary Fig. 5.** (A) Mice were administrated with Vehicle (saline), AICAR or MIF under conditions of TO901317 (n=4, respectively) stimulation. Intracellular TG contents were measured after 5 day of administration. The mice liver of the each experimental group were prepared for cryosection with optimal cutting temperature (OCT) compound and stained with Oil Red O and hematoxylin to observe the accumulation of lipids using microscopy (IX71, Olympus, Japan).
